# Supplementary material for: wEight chanGes, caRdio-mEtabolic risks and morTality in patients with hyperthyroidism (EGRET): a protocol for a CPRD–HES linked cohort study
Source: HighWire-hosted journal article supplement (doi:10.1136/bmjopen-2021-055219), 2021-10-01
Supplement: bmjopen-2021-055219supp001_data_supplement.pdf [file bmjopen-2021-055219supp001_data_supplement.pdf]

**APPENDIX: Medical codes used for data search****Table 1:** Read codes for diagnosis of hyperthyroidism

| <b>Read code</b> | <b>Description</b>                                          |
|------------------|-------------------------------------------------------------|
| C02..00          | Thyrotoxicosis                                              |
| C02..11          | Hyperthyroidism                                             |
| C02..12          | Toxic goitre                                                |
| C020.00          | Toxic diffuse goitre                                        |
| C020.11          | Basedow's disease                                           |
| C020.12          | Graves' disease                                             |
| C020000          | Toxic diffuse goitre with no crisis                         |
| C020100          | Toxic diffuse goitre with crisis                            |
| C020200          | Thyroid-associated dermatopathy                             |
| C020z00          | Toxic diffuse goitre NOS                                    |
| C021.00          | Toxic uninodular goitre                                     |
| C021000          | Toxic uninodular goitre with no crisis                      |
| C021100          | Toxic uninodular goitre with crisis                         |
| C021z00          | Toxic uninodular goitre NOS                                 |
| C022.00          | Toxic multinodular goitre                                   |
| C022000          | Toxic multinodular goitre with no crisis                    |
| C022100          | Toxic multinodular goitre with crisis                       |
| C022z00          | Toxic multinodular goitre NOS                               |
| C023.00          | Toxic nodular goitre unspecified                            |
| C023000          | Toxic nodular goitre unspecified with no crisis             |
| C023100          | Toxic nodular goitre unspecified with crisis                |
| C023z00          | Toxic nodular goitre NOS                                    |
| C024.00          | Thyrotoxicosis from ectopic thyroid nodule                  |
| C024000          | Thyrotoxicosis from ectopic thyroid nodule with no crisis   |
| C024100          | Thyrotoxicosis from ectopic thyroid nodule with crisis      |
| C024z00          | Thyrotoxicosis from ectopic thyroid nodule NOS              |
| C02y.00          | Thyrotoxicosis of other specified origin                    |
| C02y.11          | Factitia thyrotoxicosis                                     |
| C02y000          | Thyrotoxicosis of other specified origin with no crisis     |
| C02y100          | Thyrotoxicosis of other specified origin with crisis        |
| C02y200          | Thyrotoxicosis factitia                                     |
| C02y300          | Thyroid crisis                                              |
| C02yz00          | Thyrotoxicosis of other specified origin NOS                |
| C02z.00          | Thyrotoxicosis without mention of goitre or other cause     |
| C02z000          | Thyrotoxicosis without mention of goitre or cause no crisis |
| C02z100          | Thyrotoxicosis without mention of goitre, cause with crisis |
| C02zz00          | Thyrotoxicosis NOS                                          |

**Table 2:** Codes for the treatment group allocation

| Treatment group allocation           | Coding system |             |        |
|--------------------------------------|---------------|-------------|--------|
|                                      | Read          | BNF         | OPCS-4 |
| <b>Medication:</b>                   |               |             |        |
| Carbimazole                          |               | 06.02.02.00 |        |
| Propylthiouracil                     |               | 06.02.02.00 |        |
| <b>Radioiodine:</b>                  |               |             |        |
| Radioactive drug therapy             | 5A16.00       |             | X65.5  |
| I131 radiotherapy                    | 5A16.11       |             |        |
| Iodine 131 radiotherapy              | 5A16.12       |             |        |
| <b>Thyroidectomy:</b>                |               |             |        |
| Thyroid gland operations             | 711..12       |             | B12.8  |
| Thyroidectomy operations             | 7110.00       |             |        |
| Excision of thyroid gland operations | 7110.11       |             |        |
| Total thyroidectomy                  | 7110000       |             | B08.1  |
| Subtotal thyroidectomy               | 7110100       |             | B08.2  |
| Bilateral subtotal thyroidectomy     | 7110111       |             | B08.2  |
| Hemithyroidectomy                    | 7110200       |             | B08.3  |
| Lobectomy of thyroid gland NEC       | 7110300       |             | B08.4  |
| Isthmectomy of thyroid gland         | 7110400       |             | B08.5  |
| Partial thyroidectomy NEC            | 7110500       |             | B08.6  |
| Thyroidectomy NEC                    | 7110600       |             | B08.6  |
| Other specified thyroidectomy        | 7110y00       |             | B08.8  |
| Thyroidectomy NOS                    | 7110z00       |             | B08.9  |

**Table 3:** Outcomes codes

| Outcome                                            | Coding system |                                                                                                                                       |
|----------------------------------------------------|---------------|---------------------------------------------------------------------------------------------------------------------------------------|
|                                                    | ICD-10        | Read codes                                                                                                                            |
| obesity                                            |               | 22K5.00, 66C..00, 66CZ.00, C38..00, C380.00, C380.00, C380000, C380100, C380200, C380300, C380400, C380500, C38y011, C38z.00, C38z000 |
| nonfatal myocardial infarction (composite of MACE) | I21-I22       | n/a                                                                                                                                   |
| nonfatal stroke (composite of MACE)                | I64           | n/a                                                                                                                                   |
| congestive heart failure                           | I50           | n/a                                                                                                                                   |
| ischaemic heart disease                            | I20-I25       | n/a                                                                                                                                   |
| stroke and transient ischaemic attack (TIA)        | I60-I69       | n/a                                                                                                                                   |
| type 2 diabetes mellitus                           | E11           | C109*                                                                                                                                 |

MACE: major adverse cardiovascular event; TIA: transient ischemic attack
